# Supplementary material for: CA19-9 for detecting recurrence of pancreatic cancer
Source: PubMed Central journal article supplement (PMC6987233; doi:10.1038/s41598-020-57930-x), 2020-01-28

## **CA19-9 for detecting recurrence of pancreatic cancer**

Azadeh Azizian<sup>1</sup>, Felix Rühlmann<sup>1</sup>, Tanja Krause<sup>1</sup>, Markus Bernhardt<sup>1</sup>, Peter Jo<sup>1</sup>,  
Alexander König<sup>2</sup>, Mathias Kleiß<sup>3</sup>, Andreas Leha<sup>4</sup>, Michael Ghadimi<sup>1</sup>, and Jochen  
Gaedcke<sup>1\*</sup>.

<sup>1</sup> Department of General, Visceral and Pediatric Surgery, University Medical Center Goettingen,  
Goettingen, Germany.

<sup>2</sup> Department of Gastroenterology and Gastrointestinal Oncology, University Medical Center Goettingen,  
Goettingen, Germany.

<sup>3</sup> Department of Interdisciplinary Oncology and Pneumology, DRK-Kliniken Nordhessen, Kassel, Germany

<sup>4</sup> Department of Medical Statistics, University Medical Center Göttingen, Göttingen, Germany.

### **Supplementary tables' legends**

**Supplementary table S1:** Youden index (Youden), sensitivity, specificity, positive predictive value (PPV) and negative predictive value (NPV) for all points of the ROC curve in figure 3A (initial set).

**Supplementary table S2:** Youden index (Youden), sensitivity, specificity, positive predictive value (PPV) and negative predictive value (NPV) for all points of the ROC curve in figure 3B (validation)

**Supplementary figure 1: (A)** Overall survival for test set (red) and validation set (light blue) as Kaplan-Meier-Curve. **(B)** Recurrence-free survival set (red) and validation set (light blue) as Kaplan-Meier-Curve.

Supplementary table S1

| Threshold   | Sensitivity | Specificity  | PPV          | NPV          | Youden       |
|-------------|-------------|--------------|--------------|--------------|--------------|
| 1           | 82.5        | 30.77        | 78.57        | 36.36        | 13.27        |
| 1.1         | 77.5        | 38.46        | 79.49        | 35.71        | 15.96        |
| 1.2         | 75          | 38.46        | 78.95        | 33.33        | 13.46        |
| 1.3         | 75          | 53.85        | 83.33        | 41.18        | 28.85        |
| <b>1.35</b> | <b>72.5</b> | <b>61.54</b> | <b>85.29</b> | <b>42.11</b> | <b>34.04</b> |
| 1.4         | 70          | 61.54        | 84.85        | 40           | 31.54        |
| 1.45        | 70          | 61.54        | 84.85        | 40           | 31.54        |
| 1.5         | 67.5        | 61.54        | 84.38        | 38.1         | 29.04        |
| 1.55        | 65          | 61.54        | 83.87        | 36.36        | 26.54        |
| 1.6         | 65          | 61.54        | 83.87        | 36.36        | 26.54        |
| 1.7         | 62.5        | 69.23        | 86.21        | 37.5         | 31.73        |
| 1.8         | 60          | 69.23        | 85.71        | 36           | 29.23        |
| 1.9         | 60          | 69.23        | 85.71        | 36           | 29.23        |
| 2           | 60          | 69.23        | 85.71        | 36           | 29.23        |
| 2.05        | 60          | 69.23        | 85.71        | 36           | 29.23        |
| 2.1         | 55          | 69.23        | 84.62        | 33.33        | 24.23        |
| 2.15        | 55          | 69.23        | 84.62        | 33.33        | 24.23        |
| 2.2         | 52.5        | 69.23        | 84           | 32.14        | 21.73        |
| 2.25        | 47.5        | 69.23        | 82.61        | 30           | 16.73        |
| 2.3         | 47.5        | 76.92        | 86.36        | 32.26        | 24.42        |
| 2.35        | 45          | 76.92        | 85.71        | 31.25        | 21.92        |

| Threshold   | Sensitivity | Specificity  | PPV       | NPV          | Youden       |
|-------------|-------------|--------------|-----------|--------------|--------------|
| 2.4         | 45          | 84.62        | 90        | 33.33        | 29.62        |
| <b>2.45</b> | <b>45</b>   | <b>84.62</b> | <b>90</b> | <b>33.33</b> | <b>29.62</b> |
| 2.5         | 45          | 84.62        | 90        | 33.33        | 29.62        |
| 2.6         | 42.5        | 84.62        | 89.47     | 32.35        | 27.12        |
| 2.7         | 42.5        | 84.62        | 89.47     | 32.35        | 27.12        |
| 2.8         | 42.5        | 84.62        | 89.47     | 32.35        | 27.12        |
| 2.9         | 40          | 84.62        | 88.89     | 31.43        | 24.62        |
| 3           | 40          | 84.62        | 88.89     | 31.43        | 24.62        |
| 3.1         | 37.5        | 92.31        | 93.75     | 32.43        | 29.81        |
| 3.2         | 37.5        | 92.31        | 93.75     | 32.43        | 29.81        |
| 3.3         | 35          | 92.31        | 93.33     | 31.58        | 27.31        |
| 3.4         | 35          | 92.31        | 93.33     | 31.58        | 27.31        |
| 3.5         | 32.5        | 92.31        | 92.86     | 30.77        | 24.81        |
| 3.6         | 32.5        | 92.31        | 92.86     | 30.77        | 24.81        |
| 3.7         | 32.5        | 92.31        | 92.86     | 30.77        | 24.81        |
| 3.8         | 32.5        | 92.31        | 92.86     | 30.77        | 24.81        |
| 3.9         | 32.5        | 92.31        | 92.86     | 30.77        | 24.81        |
| 4           | 32.5        | 92.31        | 92.86     | 30.77        | 24.81        |
| 4.05        | 32.5        | 100          | 100       | 32.5         | 32.5         |

**Supplementary table S2**

| <b>Threshold</b> | <b>Sensitivity</b> | <b>Specificity</b> | <b>PPV</b> | <b>NPV</b> | <b>Youden</b> |
|------------------|--------------------|--------------------|------------|------------|---------------|
| 1                | 100                | 16.67              | 66.67      | 100        | 16.67         |
| 1.1              | 100                | 16.67              | 66.67      | 100        | 16.67         |
| 1.2              | 100                | 33.33              | 71.43      | 100        | 33.33         |
| 1.3              | 100                | 50                 | 76.92      | 100        | 50            |
| <b>1.35</b>      | 100                | 66.67              | 83.33      | 100        | 66.67         |
| 1.4              | 100                | 66.67              | 83.33      | 100        | 66.67         |
| 1.45             | 100                | 66.67              | 83.33      | 100        | 66.67         |
| 1.5              | 100                | 66.67              | 83.33      | 100        | 66.67         |
| 1.55             | 90                 | 66.67              | 81.82      | 80         | 56.67         |
| 1.6              | 90                 | 83.33              | 90         | 83.33      | 73.33         |
| 1.65             | 90                 | 83.33              | 90         | 83.33      | 73.33         |
| 1.7              | 90                 | 83.33              | 90         | 83.33      | 73.33         |
| 1.75             | 90                 | 83.33              | 90         | 83.33      | 73.33         |
| 1.8              | 90                 | 83.33              | 90         | 83.33      | 73.33         |
| 1.85             | 90                 | 83.33              | 90         | 83.33      | 73.33         |
| 1.9              | 90                 | 83.33              | 90         | 83.33      | 73.33         |
| 1.95             | 90                 | 83.33              | 90         | 83.33      | 73.33         |
| 2                | 90                 | 83.33              | 90         | 83.33      | 73.33         |
| 2.1              | 90                 | 83.33              | 90         | 83.33      | 73.33         |
| 2.2              | 90                 | 83.33              | 90         | 83.33      | 73.33         |
| 2.3              | 90                 | 83.33              | 90         | 83.33      | 73.33         |

| Threshold   | Sensitivity | Specificity | PPV   | NPV   | Youden |
|-------------|-------------|-------------|-------|-------|--------|
| 2.4         | 90          | 83.33       | 90    | 83.33 | 73.33  |
| <b>2.45</b> | 45          | 84.62       | 90    | 83.33 | 73.33  |
| 2.5         | 90          | 83.33       | 90    | 83.33 | 73.33  |
| 2.6         | 90          | 83.33       | 90    | 83.33 | 73.33  |
| 2.7         | 80          | 83.33       | 88.89 | 71.43 | 63.33  |
| 2.75        | 80          | 83.33       | 88.89 | 71.43 | 63.33  |
| 2.8         | 80          | 83.33       | 88.89 | 71.43 | 63.33  |
| 2.85        | 80          | 83.33       | 88.89 | 71.43 | 63.33  |
| 2.9         | 80          | 83.33       | 88.89 | 71.43 | 63.33  |
| 2.95        | 80          | 83.33       | 88.89 | 71.43 | 63.33  |
| 3           | 80          | 83.33       | 88.89 | 71.43 | 63.33  |
| 3.05        | 80          | 100         | 100   | 75    | 80     |

# Supplementary figure 1

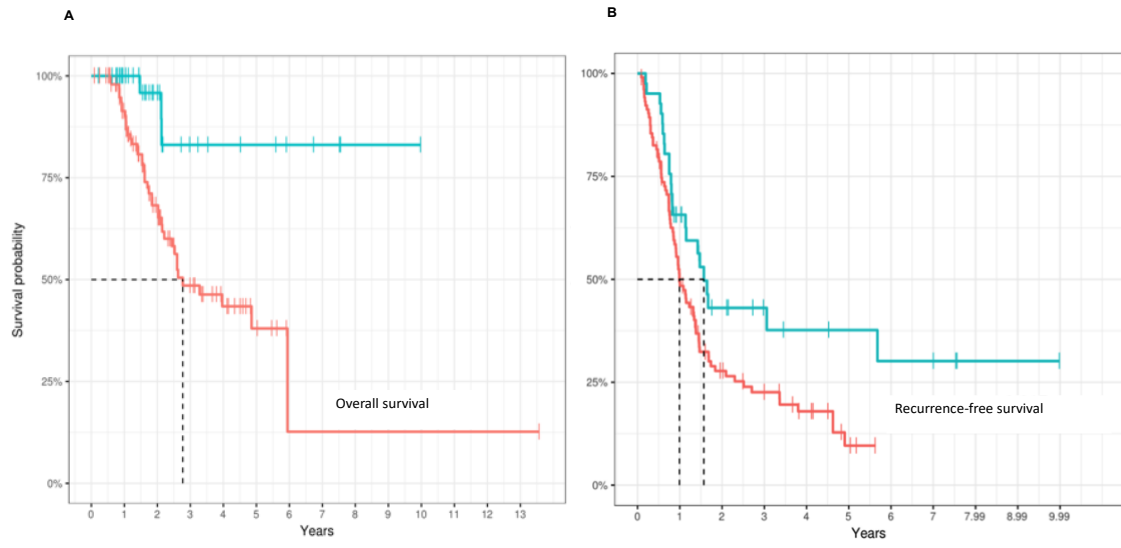

Supplement: 41598_2020_57930_MOESM1_ESM.pdf [file 41598_2020_57930_MOESM1_ESM.pdf]
